# Supplementary material for: Synthesis and Characterization of β-Cyclodextrin Functionalized Ionic Liquid Polymer as a Macroporous Material for the Removal of Phenols and As(V)
Source: PubMed Central journal article supplement (PMC3907800; doi:10.3390/ijms15010100), 2013-12-23
Supplement: ijms-15-00100-s001.pdf [file ijms-15-00100-s001.pdf]

## Supplementary Information

**Table S1.** Structural parameters of the samples.

| Polymers       | Surface area<br>(m <sup>2</sup> /g) | Pore volume<br>(cm <sup>3</sup> /g) | Pore diameter<br>(nm) | Pore size<br>distribution |
|----------------|-------------------------------------|-------------------------------------|-----------------------|---------------------------|
| βCD-TDI        | 2.401                               | 0.02188                             | 1.585                 | <2 nm (micro pore)        |
| βCD-BIMOTs-TDI | 1.254                               | 0.02435                             | 77.66                 | >50 nm (macro pore)       |

**Table S2.** DSC analysis of the samples.

| Samples        | Temperature (°C) | Peak (°C) | Exo/Endo    | Assignment                   |
|----------------|------------------|-----------|-------------|------------------------------|
| βCD-TDI        | 38–93            | 60        | Endothermic | Loss of water                |
|                | 280–343          | 323       | Endothermic | Melting of β-CD and TDI      |
|                | 343–350          | 350       | Endothermic | Melting of β-CD              |
|                | 350–357          | 356       | Exothermic  | Curing process               |
| βCD-BIMOTs-TDI | 36–79            | 70        | Endothermic | Loss of water                |
|                | 252–343          | 330       | Endothermic | Melting of β-CD, TDI, BIMOTs |

© 2013 by the authors; licensee MDPI, Basel, Switzerland. This article is an open access article distributed under the terms and conditions of the Creative Commons Attribution license (<http://creativecommons.org/licenses/by/3.0/>).
